1  
2  
3  
4  
5  
6  
7  
8  
9  
10  
11  
12  
13  
14

15 Cardiac myocytes respond differentially and synergistically to matrix stiffness and topography

16

17 Short Title: Myocyte response to matrix stiffness and topography

18

19 Authors:

20 William Wan, PhD <sup>1,\*</sup>

21 Kristen K. Bjorkman, PhD <sup>1,\*</sup>

22 Esther S. Choi <sup>1</sup>

23 Amanda L. Panepento, BA <sup>1</sup>

24 Kristi S. Anseth, PhD <sup>2,3,4</sup>

25 Leslie A. Leinwand, PhD <sup>1,4</sup>

26

27 1 Department of Molecular, Cellular, and Developmental Biology; University of Colorado;

28 Boulder, CO

29 2 Department of Chemical and Biological Engineering, University of Colorado, Boulder, CO

30 3 Howard Hughes Medical Institute, University of Colorado, Boulder, CO

31 4 BioFrontiers Institute, University of Colorado, Boulder, CO

32 \* These authors contributed equally to this work

33

34 Corresponding Author:

35 Leslie A. Leinwand, PhD

36 3415 Colorado Ave.

37 UCB 596

38 Boulder, CO 80303

39 Leslie.Leinwand@Colorado.EDU

40 Ph: 303-492-7606

41 Fx: 303-492-8907

42

43 Classification: Major category: BIOLOGICAL SCIENCES Minor category: Cell Biology

44

45

46 **Abstract**

47 During cardiac disease progression, myocytes undergo molecular, functional and structural  
48 changes, including increases in cell size and shape, decreased myocyte alignment and  
49 contractility. The heart often increases extracellular matrix production and stiffness, which affect  
50 myocytes. The order and hierarchy of these events remain unclear as available *in vitro* cell  
51 culture systems do not adequately model both physiologic and pathologic environments.  
52 Traditional cell culture substrates are 5-6 orders of magnitude stiffer than even diseased native  
53 cardiac tissue. Studies that do account for substrate stiffness often do not consider intercellular  
54 alignment and *vice versa*. We developed a cardiac myocyte culture platform that better  
55 recapitulates native tissue stiffness while simultaneously introducing topographical cues that  
56 promote cellular alignment. We show that stiffness and topography impact myocyte molecular  
57 and functional properties. We used a spatiotemporally-tunable, photolabile hydrogel platform to  
58 generate a range of stiffness and micron-scale topographical patterns to guide neonatal rat  
59 ventricular myocyte morphology. Importantly, these substrate patterns were of subcellular  
60 dimensions to test whether cells would spontaneously respond to topographical cues rather than  
61 an imposed geometry. Cellular contractility was highest and the gene expression profile was  
62 most physiologic on gels with healthy cardiac tissue stiffness. Surprisingly, while elongated  
63 patterns in stiff gels yielded the greatest cellular alignment, the cells actually had more  
64 pathologic functional and molecular profiles. These results highlight that morphological  
65 measurements alone are not a surrogate for overall cellular health as many studies assume. In  
66 general, substrate stiffness and micropatterning synergistically affect cardiac myocyte phenotype  
67 to recreate physiologic and pathologic microenvironments.

68  
69 **Significance Statement**

70 Heart disease is accompanied by organ- and cellular-level remodeling, and deconvoluting their  
71 interplay is complex. Cellular-level change is best studied *in vitro* due to greater control and  
72 uniformity of cell types compared to animals. One common metric is degree of cellular  
73 alignment as misalignment of myocytes is a hallmark of disease. However, most studies utilize  
74 featureless culture surfaces that are orders of magnitude stiffer than, and do not mimic the  
75 scaffolding of, the heart. We developed a hydrogel platform with tunable stiffness and patterns  
76 providing topographical alignment cues. We cultured heart cells on and characterized  
77 multifactorial responses to these dynamic surfaces. Interestingly, conditions that yielded greatest  
78 alignment did not yield the healthiest functional and molecular state. Thus, morphology alone is  
79 not an indicator of overall cellular health.

80  
81 **Keywords:** hydrogels, cell-material interactions, contractility, imaging, neonatal rat ventricular  
82 myocytes

83  
84  
85

## 86 Introduction

87 Cardiac myocytes undergo many molecular, biophysical, and biochemical changes during  
88 the progression of heart disease. These changes include myofibrillar and sarcomeric disarray,  
89 cell spreading and aspect ratio changes, interactions with extracellular matrix (ECM) proteins,  
90 expression of cell-cell interaction proteins, and alterations in gene expression (1–5). Myocytes  
91 interact with their extracellular microenvironment in a feedback loop that ultimately determines  
92 whether they undergo physiological or pathological remodeling that may culminate in changes in  
93 cell contractility. However, studying these changes *in vitro* is challenging, as traditional cell  
94 culture studies are conducted on smooth, isotropic surfaces made of tissue culture polystyrene  
95 (TCPS) or glass, whose stiffnesses are 5-6 orders of magnitude greater than that of native tissue.  
96 Moreover, in these systems, there is minimal control of the density, composition, and mechanics  
97 of the extracellular environment. As a result, researchers delving into the cell biology of heart  
98 disease have been unable to reproduce many of the complexities of the *in situ* environment of  
99 native hearts.

100  
101 Motivated by this gap, advances in synthetic biomaterial substrates have allowed the  
102 creation of synthetic ECM mimics that enable precise control over the presentation of substrate  
103 stiffness (6, 7), topographical cues (8), presentation of ECM proteins, and the tethering and  
104 removal of growth factors (6). These biomatrices share many properties with tissues and allow  
105 one to perform genetic and biochemical manipulations of the cellular environment, while  
106 simultaneously controlling cell-matrix interactions. Poly(ethylene glycol) (PEG) is one  
107 commonly used biomaterial substrate, and PEG is often selected because of its biocompatibility,  
108 hydrophilicity, resistance to nonspecific protein adsorption, and ability to tune its mechanical  
109 properties to match various biological tissues. Furthermore, adhesive ligands and/or cytokines  
110 can be conjugated or released at user-defined points in time and space (6). These collective  
111 properties have rendered PEG hydrogels useful for conducting experiments that are largely  
112 intractable on static plastic or glass surfaces. Examples of such studies have been reviewed  
113 elsewhere (7–9). Here, an advanced PEG hydrogel system with light-tunable properties was used  
114 to investigate how neonatal rat ventricular myocytes (NRVMs) respond to a simultaneous  
115 presentation of substrate stiffness cues and patterns.

116  
117 The stiffness (as assessed by Young’s modulus) of healthy neonatal rat myocardium is  
118 ~4-11kPa, and the stiffness of healthy adult rat myocardium is ~11-46kPa. The stiffness of  
119 infarcted areas in adult rats can reach up to 56kPa (10), while the stiffness of hearts with other  
120 fibrotic diseases ranges from ~35-50kPa (10–13). In the native myocardium, cells are arranged in  
121 a parallel, “brick-wall” pattern, while in fibrotic disease, there are numerous changes in the  
122 alignment of cardiac myocytes and in the composition and orientation of ECM proteins (14).  
123 Other groups culturing cardiac myocytes on hydrogels and flexible surfaces have demonstrated  
124 that cardiac myocytes exhibit greatest striation and maximum work and contractile force on  
125 substrates with stiffnesses between 10-17kPa, which closely matches the stiffness measured in  
126 neonatal and embryonic hearts (15, 16). Culturing cardiac myocytes on soft hydrogel substrates  
127 also attenuates the expression of pathological (fetal) genes such as *Nkx2.5* and *Anf (Nppa)* (17,  
128 18).

129  
130 Beyond control of the matrix mechanical properties, techniques such as molding and  
131 microcontact printing have been used to recreate the patterned arrangement and aspect ratio of

132 cells seen in the healthy myocardium (19–25). As expected, cell aspect ratio and alignment are  
133 both greater when NRVMs are cultured on patterned substrates than on smooth surfaces (20, 26).  
134 Specifically, culturing NRVMs on substrates micropatterned with topographical features of  
135 parallel 20  $\mu\text{m}$ -wide fibronectin lines (27), 20  $\mu\text{m}$ -wide eroded channels (22), or printed with  
136 high aspect ratio rectangular adhesion 2000-2500  $\mu\text{m}^2$  islands (28, 29) leads to higher levels of  
137 sarcomeric alignment than on isotropic surfaces. From a functional perspective, NRVMs  
138 cultured on patterned substrates generate greater peak systolic stress than cells cultured on  
139 isotropic substrates (20, 27). In a system where NRVMs were cultured on thin, flexible 80x12  
140  $\mu\text{m}$  polydimethylsiloxane (PDMS) strips arrayed in a brick wall pattern, McCain *et al.* found  
141 increased  $\alpha$  myosin heavy chain ( $\alpha\text{MHC}$ ; *Myh6*)-to- $\beta\text{MHC}$  ( $\beta\text{MHC}$ ; *Myh7*) ratios and on  
142 patterned surfaces vs. isotropic surfaces (20). Because lower  $\alpha\text{MHC}$ -to- $\beta\text{MHC}$  ratios are  
143 correlated with cardiac disease, the results of this study suggest that patterning matrix cues may  
144 promote a healthier NRVM phenotype. However, aspect ratio *alone* cannot always predict  
145 whether a cardiomyocyte is in a physiologic or pathologic state (reviewed in (1, 30). For  
146 example, the aspect ratio of a typical adult cardiomyocyte is approximately 7:1. Pressure  
147 overload due to pathologic stimuli such as high blood pressure or aortic valve stenosis, as well as  
148 physiologic stimuli such as resistance weight training can both result in aspect ratios less than 7.  
149 By contrast, volume overload due to pathologic stimuli such as valve regurgitation, ventricular  
150 septal defects, or myocardial infarctions as well as physiologic stimuli such as running or  
151 swimming can both result in aspect ratios greater than 7. Despite this wealth of experimental  
152 observations, there remains a paucity of information as to how extracellular signals influence  
153 intracellular signaling in NRVMs, and very few literature reports integrate an in-depth  
154 biomolecular characterization of NRVMs while simultaneously controlling and presenting  
155 multiple substrate microenvironmental cues.

156  
157 In recent years, a number of studies have revealed that constraining cardiomyocytes to  
158 different dimensions can result in changes in morphological and functional properties. The  
159 current study described here builds from this foundational work by examining whether  
160 micropatterned hydrogel substrates with feature dimensions smaller than an individual cell  
161 (ensuring cells remain on top of the features) are sufficient to serve as simple topographical cues  
162 to modulate molecular, structural, and functional cell-autonomous and intercellular properties.  
163 Such changes can be interpreted as integration and interpretation of environmental mechanical  
164 signals rather than a response to a forced morphological constraint. We further examine the  
165 intersection of substrate topography and stiffness to evaluate the possibility of modeling  
166 physiologic and pathologic conditions with one tunable culture platform.

## 167 168 **Results**

### 169 *NRVMs form gap junctions and contract on micropatterned photoresponsive hydrogels*

170 Patterning was performed on photoresponsive PEG hydrogels for culturing NRVMs and  
171 the process is schematically shown in Figure 1 and previously described in (31). Substrates were  
172 formulated to have a stiffness of that of either a healthy neonatal heart (10kPa) or a diseased  
173 heart (35kPa). Regular, rectangular micropatterns of dimensions 40x5 $\mu\text{m}$ , 20x5 $\mu\text{m}$ , 10x5 $\mu\text{m}$ , and  
174 5x5 $\mu\text{m}$  were formed on the surface via photodegradation. The rectangular features were spaced  
175 5 $\mu\text{m}$  apart, and typically, the NRVMs spread across many of the topographical features. The  
176 feature sizes resulted in patterns with aspect ratios ranging from 1:1 to  $\infty$ :1 (Figure 1). NRVMs  
177 in all culture conditions, including TCPS, spontaneously contracted and formed mature

178 sarcomeres (Figure 2: representative images of TCPS and 10kPa  $\infty$ :1), but sarcomeres in cells on  
179 hydrogels were better organized as revealed by F-actin staining. Collectively, these results  
180 suggest that, similar to culturing on TCPS, NRVMs cultured on both smooth and patterned PEG  
181 substrates maintained a cardiac phenotype measurable at the protein and functional levels with  
182 respect to sarcomere structure and spontaneous contractions.

183

184 *NRVM and F-actin alignment is proportional to the pattern aspect ratio*

185 Higher aspect ratio patterns (i.e., from squares to channels) resulted in higher levels of  
186 cell alignment in the direction of the pattern and lower variation in the cell orientation. The  
187 major axis of the cell nuclei relative to the patterns was used to calculate the distribution of  
188 orientational angles (Figure 3A,B). The circular standard deviation of the angular differences  
189 measures the degree of cell alignment, where low angular standard deviations represent a high  
190 degree of cell alignment and high angular standard deviations represent more random alignment  
191 of cells (Figure 3C). Infinitely long channels produced the largest number of NRVMs that were  
192 perfectly aligned with the pattern, while smooth gels and 1:1 patterns resulted in cells that were  
193 more randomly oriented (Figure 3B). Of further note, NRVMs cultured on stiffer gels were more  
194 closely aligned to the pattern compared to those on softer matrices with the same pattern. Fold  
195 changes in percent alignment observed here were consistent with changes in myocyte alignment  
196 in studies of wildtype mice (~46% aligned) and mice with hypertrophic cardiomyopathy (~25%  
197 aligned) (32).

198 Cell aspect ratio and F-actin alignment also increased in a manner that correlated with the  
199 pattern aspect ratio (Figure 4A). Cell elongation, as measured by the aspect ratio, increased as  
200 the pattern aspect ratio went from 1:1 to  $\infty$ :1 on both 10kPa and 35kPa gels. Regression slopes,  
201 representing the relationship between pattern and cell aspect ratios, were statistically significant  
202 for both soft and stiff gels (Figure 4B, Table 1). NRVMs cultured on smooth substrates adopted a  
203 slightly lower aspect ratio, as did NRVMs cultured on 1:1 soft gels (Figure 4B). On rectangular  
204 patterns with aspect ratios of 2:1 or greater, the aspect ratio for cells on gels was significantly  
205 greater than on TCPS; however, there were no significant differences in cell aspect ratio between  
206 soft and stiff gels. These results suggest that, under the experimental conditions tested, the aspect  
207 ratio of the underlying pattern had a greater impact on cell aspect ratio than substrate elasticity.

208 F-actin alignment, a measure of internal sarcomeric organization, also increased with  
209 increasing pattern aspect ratio. A fast Fourier transform (FFT) algorithm was used to quantify F-  
210 actin alignment in NRVMs cultured on both soft and stiff patterned substrates. F-actin alignment  
211 on hydrogels was normalized to the F-actin alignment of NRVMs on TCPS. Regression slopes  
212 were significant for both 10kPa and 35kPa gels, indicating a significant correlation between the  
213 underlying pattern aspect ratio and F-actin alignment (Table 1). F-actin alignment on soft gels  
214 was not significantly different than on TCPS for intermediate pattern aspect ratios of 2:1 through  
215 8:1 (Figure 4C). On channeled substrates ( $\infty$ :1), the percent F-actin alignment was higher than on  
216 TCPS and was nearly identical on soft and stiff substrates. On 1:1 aspect ratio gels, F-actin  
217 alignment was significantly higher on stiff gels.

218

219 *Fractional shortening increases with pattern aspect ratio on soft, but not stiff, gels*

220 NRVM function was assessed by measuring contractility through fractional shortening.  
221 On soft gels, there was a significant, positive relationship between pattern aspect ratio and  
222 fractional shortening (Table 1). For aspect ratios greater than 2:1, fractional shortening was also  
223 significantly greater on soft gels than on TCPS (Figure 5). On infinitely long channels, the



224 fractional shortening was significantly greater on 10kPa gels than on 35kPa gels (Figure 5).  
225 Moreover, fractional shortening of cells on channels in the 35kPa condition was statistically  
226 indistinguishable from cells on TCPS. However, measurements of the beating frequency, ~42-64  
227 beats per minute, did not indicate any statistically significant differences between NRVMs  
228 cultured on the hydrogel materials studied. Although lower than clinical values (~60% for  
229 healthy hearts to ~25% for diseased hearts (33)), fractional shortening of NRVMs cultured on  
230 PEG gels reached peak values of 22% fractional shortening on 10kPa hydrogels, significantly  
231 greater than that of 13% on 35kPa gels and 7% on TCPS (34).

232

### 233 *Hydrogel stiffness and patterning attenuate fetal gene expression*

234 Re-expression of fetal genes is a hallmark of cardiac myocyte pathology. Culturing  
235 NRVMs on hydrogels significantly reduced the expression of fetal genes, such as *Anf* and *Acta1*  
236 ( $\alpha$  skeletal actin) compared to TCPS. Relative to TCPS, *Anf* was significantly downregulated on  
237 all gel conditions (Figure 6A). *Anf* expression was not different between soft and stiff gels for all  
238 pattern aspect ratios studied, but between the 1:1 patterns and smooth gels, there was a ~2.4-4.4  
239 fold increase in *Anf* expression. *Acta1* expression was also significantly lower on all gel  
240 conditions relative to TCPS. Further, *Acta1* expression was significantly lower on soft compared  
241 to stiff gels at pattern aspect ratios greater than 2:1 (Figure 6A). However, positive regression  
242 slopes for *Anf* and *Acta1* were significant for both soft and stiff hydrogels, indicating increasing  
243 expression of these pathologic markers with increasing aspect ratios (Table 1).

244 For  $\alpha$ MHC, which is generally accepted as a beneficial gene in rodent cardiac myocytes,  
245 the regression slope was negative and was significant only for stiff gels. Conversely, the  
246 regression slope for  $\beta$ MHC (increases in which are considered pathologic), was positive and was  
247 significant only for soft gels. Overall, there was a negative trend between  $\alpha$ MHC expression and  
248 pattern aspect ratio and a positive trend between  $\beta$ MHC expression and pattern aspect ratio  
249 (Figure 6B). Regression slopes were significant for  $\alpha$ MHC on 35kPa gels,  $\beta$ MHC on 10kPa gels,  
250 and  $\alpha$ MHC/ $\beta$ MHC ratio on 35kPa gels. In total, these results suggest that the effect of pattern on  
251 myosin heavy chain isoforms is dependent on substrate stiffness.

252

### 253 *Pathological miRNA expression is decreased on patterned 10kPa hydrogels*

254 Given that miR-208a and miR-499 expression is induced in several cardiac disease  
255 models and that they may represent potential targets for drug therapies (35–37), we analyzed  
256 their expression as a function of NRVM culture conditions (Figure 6C). Significant observations  
257 included a reduction in NRVM miR-208a expression when cultured on patterned (1:1 through  
258 8:1), 10kPa hydrogels compared to TCPS; these results suggest a protective effect from a  
259 combination of substrate patterning and decreased substrate stiffness. However, the regression  
260 analysis indicated a positive slope for miR-208a expression with increasing aspect ratio on soft  
261 gels (Figure 6C). There was also a nonsignificant, but large magnitude trend for higher miR-499  
262 expression on 35kPa hydrogels. These trends are consistent with the gene expression patterns  
263 observed in Figure 6A and B and together suggest that patterned hydrogel substrates could serve  
264 as platforms to model cardiac disease processes at multiple biological levels.

265

### 266 *Hydrogel patterning and stiffness do not significantly affect calcium handling genes*

267 When simultaneously modifying substrate stiffness and patterning, expression of the  
268 calcium handling genes Cav1.2 (*Cacna1c*) and Serca2a (*Atp2a2*) was not significantly different  
269 between experimental groups; however, there was a non-significant trend for higher *Cav1.2* and

270 *Serca2a* expression on 10kPa gels (Figure S1 and Table 1). During aging and disease, *ATP2a2* is  
271 downregulated (38), while *Cav1.2* expression is reduced in pressure overload conditions (39).  
272 Varying substrate stiffness between 10kPa and 35kPa while presenting a range of pattern aspect  
273 ratios did not replicate the fold changes observed in disease models. The results suggest that a  
274 larger range of substrate stiffness or pattern shapes may be necessary to produce changes in  
275 calcium handling genes that are observed in disease.

276  
277 *Matrix remodeling genes are differentially regulated by culture on hydrogel substrates*

278 Markers of ECM remodeling, such as connective tissue growth factor (*Ctgf*) and collagen  
279 type 1 alpha 1 (*Colla1*) expression, were differentially regulated by substrate stiffness and by  
280 pattern aspect ratio (Figure S2). *Ctgf* expression on all gel samples was significantly reduced by  
281 at least two-fold relative to TCPS. *Ctgf* expression was also significantly higher on stiff gels for  
282 several pattern geometries, and regression slopes were significant for both soft and stiff gels  
283 samples. These results suggest that both substrate stiffness and pattern aspect ratio affect *Ctgf*  
284 expression. Neither pattern aspect ratio nor gel stiffness significantly affected matrix  
285 metalloproteinase 2 (*Mmp2*) expression; however, *Mmp2* expression on soft gels with 1:1 and  
286 2:1 patterns was significantly greater than on TCPS (Figure S2). *Colla1* expression was  
287 significantly lower on soft gels than on TCPS, but differences between soft and stiff gels were  
288 not significant. Regression slopes for *Colla1* expression were also not significant for soft and  
289 stiff gels.

## 290 291 **Discussion**

292 *In vivo*, cardiac myocytes experience both mechanical and topographical changes to their  
293 microenvironment during development, physiological remodeling, and disease (10, 12).  
294 Although many diverse animal models exist to test hypotheses generated from clinical  
295 observations, some hypotheses require *in vitro* systems as they offer much higher levels of  
296 control than an animal. However, *in vitro* models have lagged behind animal models in terms of  
297 providing a flexible system that can model both physiologic and pathologic cardiac states. Thus,  
298 a critical need in the field of cardiac biology is an *in vitro* system that recapitulates the (1)  
299 physical, (2) morphological, (3) functional, and (4) molecular features of both healthy and  
300 diseased microenvironments.

301 NRVMs are the most commonly used cardiomyocyte for *in vitro* studies, and several  
302 studies demonstrate that NRVMs adapt to changes in substrate stiffness or patterns by regulating  
303 their gene expression, morphology and contractility (15, 40). However, the vast majority of these  
304 studies investigate the effect of modifying one particular aspect of the cellular microenvironment  
305 amongst a multitude of factors that can change during normal development and disease  
306 processes. In this work, we developed a photodegradable and photopatternable hydrogel platform  
307 with varying micropatterns and stiffnesses (schematized in Figure 1) to evaluate whether this  
308 system could faithfully model both physiologic and pathologic states by comprehensively  
309 examining all four stated aspects of cardiomyocyte biology. In addition, the feature sizes were  
310 micron size and smaller than a typical NRVM. Thus, rather than physically constraining the  
311 NRVM artificially with topography, the hydrogels promote cell-interactions and allow the  
312 NRVMs to spontaneously align based on their underlying focal adhesions with the substrate. In  
313 this way, the hydrogel recapitulates aspects of an organized ECM-interaction and its influence on  
314 mechanotransduction. We hypothesized that the conditions in which the cardiomyocytes were

315 best aligned on the softer gels (10kPa) would preserve the most physiologic phenotype because  
316 the healthy neonatal myocardium is characterized by this modulus and by well-aligned cells.

317 Initial experiments revealed that NRVMs cultured on patterned hydrogel substrates  
318 formed mature sarcomeres. Spontaneous contraction was also observed in all experimental  
319 groups. Importantly, cell density appeared similar across all groups. These observations  
320 suggested to us that NRVMs cultured on PEG hydrogels maintained a cardiac phenotype and that  
321 our hydrogel system was suitable for more in-depth characterization of cells cultured using this  
322 platform. Biochemical and image analysis measurements indicated that both substrate stiffness  
323 and topography are significant factors that ultimately determine alignment, morphology and gene  
324 expression of NRVMs (Table 1). For many of the readouts that we investigated, the largest fold  
325 changes were observed only when varying both substrate stiffness and patterning. For example,  
326 although cellular alignment was highest on 35kPa gels with  $\infty:1$  aspect ratio patterns, fractional  
327 shortening was actually the lowest under those conditions. *Anf* and *Acta1* expression was lowest  
328 on 10kPa gels, but increased with increasing aspect ratio on gels regardless of the underlying  
329 stiffness. These results suggest that optimal levels of gene expression and contractility may occur  
330 at an intermediate pattern/aspect ratio on a soft hydrogel and that incorporating multiple  
331 microenvironment cues may increase the response range of NRVMs and lead to fold changes in  
332 assay results at clinically relevant levels. Importantly, this work emphasizes the fact that all  
333 aspects of cardiomyocyte health must be assessed, as relying on characteristic morphological  
334 changes alone can be misleading.

335

336 (1) *Physical features: intercellular alignment and substrate modulus*

337 Myocyte disarray is a key feature of cardiac disease and cells plated on traditional, flat  
338 surfaces are disarrayed in a manner similar to that observed in animal and human disease (1, 41,  
339 42). Prior studies have also found that eroding topographical patterns affects the alignment of  
340 NRVMs on smooth surfaces and surfaces with only one or two different pattern dimensions (21,  
341 22, 43). In contrast, examining a gradient of pattern aspect ratios provides the ability to mimic  
342 intermediate conditions, rather than only extremes. In addition to myocyte disarray, the stiffness  
343 of diseased hearts also increases. Using photodegradable PEG hydrogel substrates, we generated  
344 a range of pattern aspect ratios on both soft (10kPa) and stiff (35kPa) surfaces. The ability to  
345 simultaneously deliver multiple microenvironmental cues, namely stiffness and patterning,  
346 greatly expands the possible experimental space and provides the ability to examine how  
347 multiple features of disease interact. Few studies have varied both substrate stiffness and  
348 patterning. Notably, McCain *et al.* used microcontact printing to generate large, NRVM-sized  
349 fibronectin islands of varying aspect ratios on soft and stiff polyacrylamide hydrogels in order to  
350 generate cells of varying aspect ratios. They observed that shorter aspect ratio cells generated the  
351 most systolic work on 90kPa gels while longer aspect ratio cells generated the most systolic  
352 work on 13kPa gels (40). Extending from this work, Ribeiro *et al.* cultured human  
353 cardiomyocytes differentiated from induced pluripotent stem cells (iPSCs) on 10kPa  
354 polyacrylamide hydrogels patterned with 2000  $\mu\text{m}^2$  matrigel adhesion islands to constrain cells  
355 to different aspect ratios. They demonstrated that such a platform resulted in better  
356 differentiation and higher mechanical output (29).

357 In contrast, our study evaluated whether cardiomyocytes would spontaneously adapt to  
358 micropatterned substrates. We photo-eroded small micropatterns ( $\sim 1000\mu\text{m}^2$ ), less than the size  
359 of single cells, to direct cell alignment without forcing a particular cell shape and aspect ratio  
360 through adhesion islands, as is the common approach in published studies (29, 40). We interpret



361 the spontaneous molecular, structural, and functional changes we observed to represent a true  
362 signal-response relationship between the environment and the myocyte that may more accurately  
363 reflect *in vivo* cardiac remodeling. For example, fold changes in percent alignment observed  
364 between patterned and smooth substrates were consistent with changes in myocyte alignment in  
365 studies of wildtype mice (~46% aligned) and mice with hypertrophic cardiomyopathy (~25%  
366 aligned) (32). Myocyte disarray was modeled using a range of micropattern aspect ratios, and  
367 NRVMs cultured on soft and stiff hydrogels exhibited similar changes in disarray as observed in  
368 *in vivo* systems (Figure 3). Our results indicate a greater percentage of cells aligned on the 35kPa  
369 ∞:1 substrate than the 10kPa ∞:1 substrate. This finding may seem to contradict our initial  
370 assumption that the 10kPa substrate modeled a healthier condition. However, we also observed  
371 highest function on the 10kPa ∞:1 substrate. Disease progression is a complicated multifactorial  
372 process where all cells start at the same state and cells in the diseased tissue remodel and respond  
373 to their changing conditions. In a comparably simple *in vitro* system, the “health” range of cell  
374 alignment may be different. Nonetheless, our patterned substrates could induce cell alignment  
375 significantly greater than that of smooth surfaces.

376

### 377 (2) Morphological features: cellular aspect ratio

378 During heart failure, the morphology of human cardiac myocytes changes as the cells  
379 elongate, and aspect ratios have been known to increase by a factor of 1.8 (34, 44, 45).  
380 Moreover, increased aspect ratios can result from long-term aerobic training while decreased  
381 aspect ratios can result from resistance training. Therefore, aspect ratio should not be viewed as a  
382 singular metric of cardiomyocyte health. We took a multifactorial approach and modified  
383 substrate stiffness and topographic pattern aspect ratios concomitantly. This resulted in cell  
384 aspect ratios that spanned a 2.2 fold range, covering fold changes observed in human samples  
385 and rodent models. It is also interesting to note that the NRVM aspect ratios on 10kPa hydrogels  
386 alone appeared to cover a slightly broader dynamic range than on stiff hydrogels. Simultaneously  
387 varying substrate stiffness and patterning resulted in significantly greater F-actin alignment on  
388 stiff hydrogels than on TCPS (Figure 4). These observations suggested to us that in addition to  
389 the significant effect of the pattern’s aspect ratio on F-actin alignment, the effect of substrate  
390 stiffness may depend on the underlying pattern. While the bending stiffness and available  
391 binding area of patterns may also influence cell morphology and F-actin organization,  
392 systematically modifying these factors, such as using more than two stiffnesses, was beyond the  
393 scope of the current study and is the subject of future experiments. Although neonatal cells were  
394 used, simultaneous modulation of substrate stiffness and pattern aspect ratio produced a range of  
395 cell aspect ratios that span values measured in both healthy adult individuals and patients with  
396 ischemic cardiomyopathy (45).

397

### 398 (3) Functional features: fractional shortening

399 Fractional shortening values that were measured while varying substrate stiffness and  
400 patterning ranged from ~13% to ~22% for a dynamic range of 1.7 fold. These values are similar  
401 to those reported elsewhere for NRVMs cultured on 8kPa polyacrylamide hydrogels (46).  
402 Clinical fractional shortening values based on *in situ* measurements of ventricular geometry  
403 range from up to ~60% for healthy hearts to ~25% for diseased hearts (33); however, isolated  
404 cells in culture often exhibit much lower values of ~7% (34). On 10kPa hydrogels, fractional  
405 shortening increased with pattern aspect ratio, while on 35kPa hydrogels there was a trend for  
406 decreasing fractional shortening with increasing pattern aspect ratio. Fractional shortening

407 dropped precipitously between 8:1 and channel features on 35 kPa gels. It is worth noting that  
408 the cells need to form focal adhesions with the matrix, and these would be expected to be sparser  
409 in the short dimension on channels where they are less likely to encounter the substrate. This,  
410 coupled with the pathologic changes in gene expression (particularly the decreased  $\alpha$ MHC and  
411 increased  $\beta$ MHC expression) could account for this decrease in function. These results suggest  
412 that substrate stiffness significantly affects fractional shortening when cells are aligned with high  
413 aspect ratio patterns. Another observation is that fractional shortening was greatest at an  
414 intermediate value of effective stiffness, a function of substrate stiffness and patterning. Other  
415 studies have shown optimal contractility on smooth substrates with an intermediate stiffness,  
416  $\sim 10$ kPa (16, 47). Simultaneous delivery of multiple microenvironmental cues revealed potential  
417 interacting variables such as available cell growth area, effective substrate stiffness, and pattern  
418 geometry. These experimental parameters represent opportunities to better design optimal cell  
419 culture platforms. Investigating how these factors affect NRVM contractility is a subject of  
420 ongoing studies.

421  
422 (4) *Molecular features: gene expression signatures*

423 Fetal genes are expressed during development but are downregulated during normal  
424 postnatal growth and adulthood (48). *Anf* and *Acta1* are upregulated during cardiac disease and  
425 the expression of both was attenuated in NRVMs cultured on all PEG hydrogels relative to  
426 TCPS. In comparing 1:1 patterned to smooth hydrogels, *Anf* expression increased  $\sim 2.4$ - $4.4$  fold,  
427 thus mimicking fold changes seen clinically when volumetric overload of the heart causes  
428 stretching of the myocardium and increased matrix stiffness sensed by the myocytes (49).  
429 Expression of *Acta1* has been positively correlated with contractile function (50), a phenomenon  
430 we observed with increasing aspect ratio on 10kPa substrates. However, our study also supports  
431 the observation that *Acta1* expression increases with increasing disease burden as we measured  
432 the highest levels of *Acta1* on 35kPa gels with  $\infty$ :1 patterns, where we also measured lowest  
433 fractional shortening (Figure 5). Notably, we measured as great an increase in *Anf* and *Acta1*  
434 expression due to increasing the pattern aspect ratio as due to increasing the substrate stiffness.  
435 These data suggest that patterning had a greater effect on *Anf* and *Acta1* when presented in stiff  
436 environments compared to soft.

437 Matrix remodeling, alterations in normal calcium handling, and a decrease in the  
438  $\alpha$ MHC/ $\beta$ MHC ratio are also seen in cardiac disease (51). Connective tissue growth factor  
439 (CTGF) is induced during heart failure (52). It is upstream of many ECM remodeling pathways  
440 and the accumulation of matrix proteins, such as collagens, results in fibrosis further leading to  
441 dysfunction and even sudden cardiac death. Increasing pattern aspect ratio led to increasing *Ctgf*  
442 expression regardless of substrate stiffness (Figure S2). However, the expression of *Colla1* was  
443 significantly lower than TCPS only on soft hydrogels. These findings suggest that global ECM  
444 remodeling is sensitive to small changes in substrate stiffness. Although we did not observe  
445 differential expression of the calcium handling genes *Cav1.2* and *Serca2a* in any of our  
446 conditions (Figure S1), a larger range of substrate stiffness may be required to observe the same  
447 changes found in other studies.  $\alpha$ MHC expression was greater on soft, 10kPa gels than on stiff  
448 gels. While we measured generally higher (and thus more physiologic)  $\alpha$ MHC/ $\beta$ MHC ratios on  
449 soft gels (Figure 6), the  $\alpha$ MHC/ $\beta$ MHC ratio appears to decline beyond the 4:1 aspect ratio and  
450 ultimately approach that of the 35kPa gels. This suggests increasing pathologic state with  
451 increasing aspect ratio. We also found significantly decreased expression of miR-208a on 10kPa  
452 gels relative to TCPS but a positive regression slope with increasing aspect ratio. Increased

453 human patient serum levels of miR-208a and miR-499 have been observed after myocardial  
454 infarction (53), and transgenic overexpression of each is sufficient to cause cardiac hypertrophy  
455 and dysfunction in mice (37, 54). Once again, high aspect ratios begin to counteract the beneficial  
456 effects of soft substrates. These results suggest that softer substrates promote greater contractility  
457 as well as reduced pathological gene expression at intermediate aspect ratios, as summarized in  
458 Figure 7.

459

#### 460 *Study Limitations and Future Directions*

461 This work along with the previous studies referenced herein indicate that substrate  
462 modulus and topography are strong stimuli for cardiomyocyte adaptation to environmental  
463 changes and that the culture platform can be manipulated to mimic both pathologic and  
464 physiologic cardiac states. The ultimate goal in modeling cardiomyocyte biology, however, is to  
465 establish a system conducive to culturing adult human cardiomyocytes. The study presented here  
466 uses NRVMs, which are both a different species and a different developmental stage.  
467 Unfortunately, current iPSC-derived human cardiomyocytes more closely resemble fetal  
468 cardiomyocytes and often these cultures differentiate to mixtures of atrial, ventricular, and nodal  
469 cardiomyocytes (55). Ribeiro and colleagues demonstrated that gel-based culture platforms with  
470 patterned adhesion islands could improve differentiation of iPSC-derived human  
471 cardiomyocytes, although their system imposes cellular morphology through adhesion islands  
472 with no resulting gene expression differences between patterned and unpatterned substrates (29).  
473 Given that our system simply provides topographical cues with significant consequences to  
474 multiple aspects of cellular mechanics and physiology, it would be interesting to evaluate  
475 whether further improvements to iPSC differentiation, particularly with respect to cell fate, could  
476 be achieved with our system. Another key consideration is the three dimensional environment of  
477 the culture platform. In our current system as well as many published systems, cells are cultured  
478 on top of gels. However, the heart is a three-dimensional organ and ventricular myocytes are  
479 typically encased in the extracellular matrix. In a two-dimensional culture platform, only one  
480 face of the cell is in contact with the substrate, creating a differential with respect to mechanical  
481 and chemical cues. Thus a logical extension is to move towards a three-dimensional hydrogel-  
482 based culture system, an active area of investigation. Indeed, Ronaldson-Bouchard and  
483 colleagues have achieved vast improvements in maturation (ultrastructure, gene expression,  
484 contractile properties, metabolic profiles, and calcium handling) of *in vitro* differentiated hiPSC-  
485 derived cardiomyocytes by combining three-dimensional fibrin hydrogel platforms with dynamic  
486 electrical stimulation regimes beginning early in differentiation (56). Combining this approach  
487 with a tunable hydrogel system whose stiffness could be matured from a more pliant, fetal range  
488 to a stiffer, more adult-like range while the cells differentiate is intriguing. In addition,  
489 translating 2D topographical patterning to 3D cell culture environments is an area of growing  
490 interest, and photopatternable materials, as the one used here, provide specific advantages over  
491 micromolding or microprinting techniques when combined with single and two photon laser  
492 lithography. Such a system would also be amenable to modeling interfaces, such as between the  
493 border zone and the infarct zone of an infarcted heart.

494 We measured contractility as an indicator of cardiomyocyte function, but another key  
495 functional measurement is the traction forces the cell exerts on the substrate as it contracts.  
496 While this technique has been well-refined for cells on planar surfaces, it is still being developed  
497 for cells on three-dimensional substrates (57). Non-planar substrates lead to large error in the z  
498 direction with variable point spread functions, making reliable analysis with typical equipment

499 difficult. Advances in hardware and analytical approaches should make this a more tractable  
500 problem in the future.

## 501 502 *Conclusions*

503 Cardiac myocytes sense and interact with their microenvironment through a wide range  
504 of biochemical and morphological responses (Figure 7). Here, biochemical and biophysical  
505 approaches were used to investigate how NRVMs respond to multiple, concurrent  
506 microenvironmental cues, namely substrate stiffness and patterning. In contrast to previous  
507 studies that examined the response of NRVMs to only a single factor, this study demonstrated  
508 that both substrate stiffness and topographical patterning synergistically affect cellular  
509 morphology, NRVM gene expression profiles and contractility. In many cases, we observed the  
510 effects due to substrate stiffness only at certain pattern aspect ratios. This study underscores how  
511 cells can integrate multiple microenvironmental cues, and that concurrent signals can  
512 synergistically alter cell function. Because of the complexity of the cellular response to matrix  
513 signals, it is essential to test several experimental factors in *in vitro* disease models, since results  
514 from modifying only one factor may mask the effects of other critical factors. In addition, many  
515 studies evaluating the cellular response to environment measure few outputs, such as cell  
516 morphology. However, this study reveals that a broad range of cellular metrics (i.e., physical,  
517 morphological, functional, and molecular) must be tested in order to fully evaluate the health of a  
518 cardiomyocyte: gross readouts such as cell morphology can be misleading when considered  
519 alone. Importantly, simultaneous presentation of substrate stiffness and topographical cues  
520 replicates fold changes in cell morphology and gene expression observed *in vitro* as well as in  
521 animal models of cardiac disease. The collective results suggest that differences in the  
522 microenvironmental stiffness and patterns that influence cell-matrix interactions are both  
523 important in regulating cardiac myocyte gene expression and contractile response. Recreating  
524 multiple aspects of *in vivo* systems using bioscaffolds with tunable properties for *in vitro*  
525 experiments provides complementary information that allows investigators to more  
526 comprehensively understand how cells respond to physiological and pathological  
527 microenvironments.

## 528 529 **Materials and Methods**

### 530 531 *Hydrogel formulation*

532 A photodegradable PEG crosslinker (PEGdiPDA) was synthesized as previously  
533 described (58). PEGdiPDA ( $M_n \sim 4070$  g/mol, 8.2 wt%) was copolymerized with poly(ethylene  
534 glycol) monoacrylate ( $M_n \sim 400$  g/mol, 6.8 wt%, Monomer-Polymer and Dajac Laboratories,  
535 Inc) via a radical initiated chain polymerization. Gelatin (100 bloom, 1mg/mL, MP Biomedicals)  
536 was included in the monomer solution to promote cell-matrix interactions and adhesion. Gelation  
537 was initiated through a redox reaction by combining 0.2M ammonium persulfate with 0.1M  
538 tetraethylmethylenediamine. The monomer solution was briefly vortexed and pipetted between a  
539 glass slide and glass coverslip that was functionalized with acrylate groups (59) to covalently  
540 link the final hydrogel to the coverslip. After gelation (~5 minutes), hydrogels were briefly  
541 immersed in phosphate buffered saline (PBS), separated from the glass slide, and stored in PBS  
542 at 4°C until use. Rheological measurements of the initial, stiff (35kPa, Young's modulus) gels  
543 were similar to previous studies from our group (60).

544



545 *Generation of micropatterned substrates*

546 A custom photomask was used to control the pattern of light illumination and generate  
547 topographical patterns on polymerized gels. The originally fabricated stiff gels (35kPa) were  
548 placed in contact with the selected photomask and subsequently irradiated with collimated  
549 365nm light (Omnigence) at 15mW/cm<sup>2</sup> for 300s. The photomask allowed transfer of  
550 micropatterned rectangles to the gel substrate that were 5µm apart with geometries of 5 µm x  
551 5 µm, 10 µm x 5 µm, 20 µm x 5 µm, 40 µm x 5 µm and 5 µm wide channels corresponding to  
552 aspect ratios of 1:1, 2:1, 4:1, 8:1 and infinity:1 (∞:1) (Figure 1). To generate soft patterned  
553 substrates, a set of patterned gels was then uniformly irradiated, without a photomask, for 300s.  
554 This additional exposure step generated substrates with a reduced crosslinking density,  
555 corresponding to a 10kPa gel stiffness. Smooth, unpatterned, 35kPa and 10kPa gels were also  
556 used. The irradiation time used to generate soft surfaces, via controlled photodegradation of the  
557 hydrogel crosslinks, was similar to the time scale and values reported in previous studies (60). In  
558 previous studies from our group, we validated rheometry measurements of irradiated gels by  
559 atomic force microscopy and validated pattern uniformity by two-photon confocal laser scanning  
560 microscopy (61).

561  
562 *Cell isolation and culture*

563 Neonatal rat ventricular myocytes were isolated according to previously published  
564 procedures (62). Unless noted, all reagents were purchased from Sigma. Briefly, hearts were  
565 excised from 1-3 day old Sprague-Dawley rat pups. The atria were removed from the hearts and  
566 discarded. The remaining ventricle sections were minced using scissors and digested in trypsin.  
567 After pre-plating for 2 hours, NRVMs in suspension were collected and counted. Primary cell  
568 isolates were seeded at ~50,000 cells/cm<sup>2</sup> on gel samples or on gelatin coated standard tissue  
569 culture polystyrene (TCPS) plates. During the first 24 hours of culture, cells were plated in  
570 growth media containing Minimum Essential Medium (MEM) with Hank's salts (Gibco), 5 vol%  
571 calf serum, 50U/mL penicillin, 2µg/mL Vitamin B-12, and 30nM bromodeoxyuridine (BrdU).  
572 After 24 hours, cells were washed, and the media was changed to one consisting of MEM,  
573 10µg/mL insulin, 10µg/mL transferrin, 0.1 wt/vol% bovine serum albumen (BSA), 50U/mL  
574 penicillin, 2µg/mL Vitamin B-12, 30nM BruU, and 10 vol% fetal bovine serum (FBS). For  
575 subsequent experiments, cells were collected or stained at day 4. All animal procedures were  
576 approved by the Institutional Animal Care and Use Committee at the University of Colorado.

577  
578 *Fractional shortening*

579 Videos of spontaneously contracting cardiac myocytes were collected through a 40x  
580 objective (1.0 NA) at 50 frames per second using a high-speed camera (HiSpec1 G2, Fastec  
581 Imaging) on an upright widefield fluorescence microscope (Examiner.Z1, Zeiss). While imaging,  
582 cells were maintained in warm Tyrode's solution, and before imaging, cells were pre-incubated  
583 with 2µM CellTracker Red CMPTX (Life Technologies) for visualization under fluorescence  
584 and for later segmentation and contractility measurements.

585  
586 *Cell staining*

587 Cells were fixed in 4% paraformaldehyde (Electron Microscopy Sciences) for 5 minutes,  
588 washed in PBS and permeabilized in 0.1% Triton X-100 (Fisher) for 3 minutes. F-actin and  
589 nuclei were stained with phalloidin conjugated to an Alexa Fluor 488 fluorophore (Life  
590 Technologies) and 4',6-diamidino-2-phenylindole, DAPI (Life Technologies), according to





634 quantification with the Pfaffl method was used to determine gene expression changes. Target  
635 genes are listed in Table S1.

636 For miRNA analysis, Taqman®-based assays were performed according to the  
637 manufacturer's instructions (Applied Biosystems). Briefly, 6.67 ng total RNA was reverse  
638 transcribed in 10µL using a TaqMan® MicroRNA Reverse Transcription Kit (Applied  
639 Biosystems catalog #4366596). miRNA expression was assessed with 20µL reactions prepared  
640 from the TaqMan® Universal PCR Master Mix, no AmpErase® UNG kit (Applied Biosystems  
641 catalog #4324018) and the appropriate TaqMan MicroRNA assay (catalog #4427975) on a Bio-  
642 Rad thermal cycler with cycling conditions according to the TaqMan instructions. Relative  
643 quantification based on the  $\Delta\Delta C_T$  method was performed with U6 RNA as the reference gene.

#### 644 *Data analysis*

646 Each experiment consisted of at least 9 replicates from several independent cell  
647 isolations. Data are presented as mean  $\pm$  standard error of the mean (SEM). The effects of  
648 substrate stiffness and pattern geometry were analyzed by defining pattern geometry as an  
649 ordered factor and applying general linear models in R (67). Analysis of variance (ANOVA) was  
650 used to estimate the effect of pattern geometry and substrate stiffness on the experimental  
651 outputs. Regressions were used to separately estimate the effect of pattern geometry on cells that  
652 were cultured on either soft or stiff substrates. Pattern aspect ratios were entered as ordered  
653 categorical factors in the following order: smooth, 1:1, 2:1, 4:1, 8:1 and infinity:1 ( $\infty$ :1). Slopes  
654 that were significantly greater than zero indicated a significant effect in the cellular response  
655 with increasing aspect ratio in the topography of the hydrogel surface. *Post-hoc*, pairwise  
656 comparisons were also performed, and p-values adjusted using Bonferroni's correction. Cell  
657 alignment data were analyzed using circular statistics, and the equal kappa test was used to  
658 determine whether standard deviations were statistically different from smooth and patterned  
659 surfaces. While biological systems are often nonlinear, general linear models provide  
660 conservative measures of experimental effects and minimize chances of overfitting the data.  
661 Effects, slopes, and comparisons were considered significant at  $p < 0.05$ .

#### 662 **Acknowledgements**

664 We thank Ann Robinson for assistance with NRVM cell isolation, and Ciera N. Dolechek  
665 for technical assistance. We also thank Dr. Chelsea Magin for insightful discussion.

#### 666 **Sources of funding**

668 This work was supported by the National Institutes of Health (GM029090), the Howard  
669 Hughes Medical Institute, the National Science Foundation Postdoctoral Research Fellowship in  
670 Biology under Grant No. (1307559), the American Heart Association Postdoctoral fellowship to  
671 W.W. (13POST14730015), and the American Heart Association Undergraduate Student  
672 Research Program to E.S.C. (16UFEL31660000).

#### 673 **Disclosures**

675 None

#### 676 **References**

- 677
- 678 1. Harvey PA, Leinwand LA (2011) The cell biology of disease: cellular mechanisms of  
679

- 680 cardiomyopathy. *J Cell Biol* 194(3):355–65.
- 681 2. Machackova J, Barta J, Dhalla NS (2006) Myofibrillar remodeling in cardiac hypertrophy,  
682 heart failure and cardiomyopathies. *Can J Cardiol* 22(11):953–68.
- 683 3. Roberts R, Sigwart U (2001) New Concepts in Hypertrophic Cardiomyopathies, Part I.  
684 *Circulation* 104(17):2113–2116.
- 685 4. Berk BC, Fujiwara K, Lehoux S (2007) ECM remodeling in hypertensive heart disease. *J*  
686 *Clin Invest* 117(3):568–75.
- 687 5. Dupont E, et al. (2001) Altered connexin expression in human congestive heart failure. *J*  
688 *Mol Cell Cardiol* 33(2):359–71.
- 689 6. Azagarsamy MA, Anseth KS (2013) Wavelength-controlled photocleavage for the  
690 orthogonal and sequential release of multiple proteins. *Angew Chemie - Int Ed*  
691 52(51):13803–13807.
- 692 7. Tibbitt MW, Anseth KS (2012) Dynamic microenvironments: the fourth dimension. *Sci*  
693 *Transl Med* 4(160):160ps24.
- 694 8. Grim JC, Marozas IA, Anseth KS (2015) Thiol-ene and photo-cleavage chemistry for  
695 controlled presentation of biomolecules in hydrogels. *J Control Release*.  
696 doi:10.1016/j.jconrel.2015.08.040.
- 697 9. Kyburz KA, Anseth KS (2015) Synthetic mimics of the extracellular matrix: how simple  
698 is complex enough? *Ann Biomed Eng* 43(3):489–500.
- 699 10. Berry MF, et al. (2006) Mesenchymal stem cell injection after myocardial infarction  
700 improves myocardial compliance. *Am J Physiol Heart Circ Physiol* 290(6):H2196–203.
- 701 11. Azeloglu EU, Costa KD (2010) Cross-bridge cycling gives rise to spatiotemporal  
702 heterogeneity of dynamic subcellular mechanics in cardiac myocytes probed with atomic  
703 force microscopy. *Am J Physiol Heart Circ Physiol* 298(3):H853–60.
- 704 12. Bhana B, et al. (2010) Influence of substrate stiffness on the phenotype of heart cells.  
705 *Biotechnol Bioeng* 105(6):1148–60.
- 706 13. Majkut S, et al. (2013) Heart-specific stiffening in early embryos parallels matrix and  
707 myosin expression to optimize beating. *Curr Biol* 23(23):2434–2439.
- 708 14. Wei S, et al. (2010) T-tubule remodeling during transition from hypertrophy to heart  
709 failure. *Circ Res* 107(4):520–531.
- 710 15. Jacot JG, McCulloch AD, Omens JH (2008) Substrate stiffness affects the functional  
711 maturation of neonatal rat ventricular myocytes. *Biophys J* 95(7):3479–3487.
- 712 16. Engler AJ, et al. (2008) Embryonic cardiomyocytes beat best on a matrix with heart-like  
713 elasticity: scar-like rigidity inhibits beating. *J Cell Sci* 121(Pt 22):3794–802.
- 714 17. Galie PA, Khalid N, Carnahan KE, Westfall M V, Stegemann JP (2012) Substrate  
715 stiffness affects sarcomere and costamere structure and electrophysiological function of  
716 isolated adult cardiomyocytes. *Cardiovasc Pathol*. doi:10.1016/j.carpath.2012.10.003.
- 717 18. Forte G, et al. (2012) Substrate stiffness modulates gene expression and phenotype in  
718 neonatal cardiomyocytes in vitro. *Tissue Eng Part A*. doi:10.1089/ten.TEA.2011.0707.
- 719 19. McCain ML, Agarwal A, Nesmith HW, Nesmith AP, Parker KK (2014) Micromolded

- 720 gelatin hydrogels for extended culture of engineered cardiac tissues. *Biomaterials*  
721 35(21):5462–71.
- 722 20. McCain ML, Sheehy SP, Grosberg A, Goss JA, Parker KK (2013) Recapitulating  
723 maladaptive, multiscale remodeling of failing myocardium on a chip. *Proc Natl Acad Sci*  
724 *U S A* 110(24):9770–5.
- 725 21. Annabi N, et al. (2013) Highly Elastic Micropatterned Hydrogel for Engineering  
726 Functional Cardiac Tissue. *Adv Funct Mater* 23(39):4950–4959.
- 727 22. Tsang KMC, et al. (2014) Facile One-Step Micropatterning Using Photodegradable  
728 Gelatin Hydrogels for Improved Cardiomyocyte Organization and Alignment. *Adv Funct*  
729 *Mater*:n/a-n/a.
- 730 23. Lin Y-D, et al. (2014) A nanopatterned cell-seeded cardiac patch prevents electro-  
731 uncoupling and improves the therapeutic efficacy of cardiac repair. *Biomater Sci* 2(4):567.
- 732 24. Parker KK, Tan J, Chen CS, Tung L (2008) Myofibrillar architecture in engineered  
733 cardiac myocytes. *Circ Res* 103(4):340–2.
- 734 25. Bursac N, Parker KK, Irvanian S, Tung L (2002) Cardiomyocyte Cultures With  
735 Controlled Macroscopic Anisotropy: A Model for Functional Electrophysiological Studies  
736 of Cardiac Muscle. *Circ Res* 91(12):45e–54.
- 737 26. Au HTH, Cheng I, Chowdhury MF, Radisic M (2007) Interactive effects of surface  
738 topography and pulsatile electrical field stimulation on orientation and elongation of  
739 fibroblasts and cardiomyocytes. *Biomaterials* 28(29):4277–93.
- 740 27. Feinberg AW, et al. (2012) Controlling the contractile strength of engineered cardiac  
741 muscle by hierarchal tissue architecture. *Biomaterials* 33(23):5732–5741.
- 742 28. Bray M-AA, Sheehy SP, Parker KK (2008) Sarcomere alignment is regulated by myocyte  
743 shape. *Cell Motil Cytoskeleton* 65(8):641–51.
- 744 29. Ribeiro AJS, et al. (2015) Contractility of single cardiomyocytes differentiated from  
745 pluripotent stem cells depends on physiological shape and substrate stiffness. *Proc Natl*  
746 *Acad Sci* 112(41):12705–12710.
- 747 30. Fernandes T, Soci UPR, Oliveira EM (2011) Eccentric and concentric cardiac hypertrophy  
748 induced by exercise training: MicroRNAs and molecular determinants. *Brazilian J Med*  
749 *Biol Res* 44(9):836–847.
- 750 31. Kloxin AM, Kasko AM, Salinas CN, Anseth KS (2009) Photodegradable hydrogels for  
751 dynamic tuning of physical and chemical properties. *Science* 324(5923):59–63.
- 752 32. Luckey SW, et al. (2007) Blocking cardiac growth in hypertrophic cardiomyopathy  
753 induces cardiac dysfunction and decreased survival only in males. *Am J Physiol Heart*  
754 *Circ Physiol* 292(2):H838-45.
- 755 33. Mosterd A (1999) Prevalence of heart failure and left ventricular dysfunction in the  
756 general population; The Rotterdam Study. *Eur Heart J* 20(6):447–455.
- 757 34. Gerdes AM, Capasso JM (1995) Structural remodeling and mechanical dysfunction of  
758 cardiac myocytes in heart failure. *J Mol Cell Cardiol* 27(3):849–856.
- 759 35. van Rooij E, et al. (2009) A family of microRNAs encoded by myosin genes governs  
760 myosin expression and muscle performance. *Dev Cell* 17(5):662–73.

- 761 36. Montgomery RL, et al. (2011) Therapeutic inhibition of miR-208a improves cardiac  
762 function and survival during heart failure. *Circulation* 124(14):1537–47.
- 763 37. Matkovich SJ, Hu Y, Eschenbacher WH, Dorn LE, Dorn GW (2012) Direct and indirect  
764 involvement of MicroRNA-499 in clinical and experimental cardiomyopathy. *Circ Res*  
765 111(5):521–531.
- 766 38. Hovnanian A (2007) SERCA pumps and human diseases. *Subcell Biochem* 45:337–63.
- 767 39. Wang Z, Kutschke W, Richardson KE, Karimi M, Hill JA (2001) Electrical remodeling in  
768 pressure-overload cardiac hypertrophy: role of calcineurin. *Circulation* 104(14):1657–63.
- 769 40. McCain ML, Yuan H, Pasqualini FS, Campbell PH, Parker KK (2014) Matrix elasticity  
770 regulates the optimal cardiac myocyte shape for contractility. *Am J Physiol Heart Circ*  
771 *Physiol* 306(11):H1525-39.
- 772 41. Rossi MA (1998) Pathologic fibrosis and connective tissue matrix in left ventricular  
773 hypertrophy due to chronic arterial hypertension in humans. *J Hypertens* 16(7):1031–41.
- 774 42. Zimmerman SD, Karlon WJ, Holmes JW, Omens JH, Covell JW (2000) Structural and  
775 mechanical factors influencing infarct scar collagen organization. *Am J Physiol - Hear*  
776 *Circ Physiol* 278(1):H194–H200.
- 777 43. Wang P-Y, Yu J, Lin J-H, Tsai W-B (2011) Modulation of alignment, elongation and  
778 contraction of cardiomyocytes through a combination of nanotopography and rigidity of  
779 substrates. *Acta Biomater* 7(9):3285–93.
- 780 44. Ohler A, et al. (2009) Two-photon laser scanning microscopy of the transverse-axial  
781 tubule system in ventricular cardiomyocytes from failing and non-failing human hearts.  
782 *Cardiol Res Pract* 2009:802373.
- 783 45. Gerdes AM, et al. (1992) Structural remodeling of cardiac myocytes in patients with  
784 ischemic cardiomyopathy. *Circulation* 86(2):426–30.
- 785 46. Kuo P-L, et al. (2012) Myocyte shape regulates lateral registry of sarcomeres and  
786 contractility. *Am J Pathol* 181(6):2030–7.
- 787 47. Majkut SF, Discher DE (2012) Cardiomyocytes from late embryos and neonates do  
788 optimal work and striate best on substrates with tissue-level elasticity: metrics and  
789 mathematics. *Biomech Model Mechanobiol*. doi:10.1007/s10237-012-0413-8.
- 790 48. van Berlo JH, Elrod JW, Aronow BJ, Pu WT, Molkentin JD (2011) Serine 105  
791 phosphorylation of transcription factor GATA4 is necessary for stress-induced cardiac  
792 hypertrophy in vivo. *Proc Natl Acad Sci U S A* 108(30):12331–12336.
- 793 49. Lattion AL, Michel JB, Arnauld E, Corvol P, Soubrier F (1986) Myocardial recruitment  
794 during ANF mRNA increase with volume overload in the rat. *Am J Physiol Hear Circ*  
795 *Physiol* 251(5):H890-896.
- 796 50. van Oort RJ, et al. (2006) MEF2 activates a genetic program promoting chamber dilation  
797 and contractile dysfunction in calcineurin-induced heart failure. *Circulation* 114(4):298–  
798 308.
- 799 51. Miyata S, Minobe W, Bristow MR, Leinwand LA (2000) Myosin Heavy Chain Isoform  
800 Expression in the Failing and Nonfailing Human Heart. *Circ Res* 86(4):386–390.
- 801 52. Panek AN, et al. (2009) Connective tissue growth factor overexpression in



- 802 cardiomyocytes promotes cardiac hypertrophy and protection against pressure overload.  
803 *PLoS One* 4(8):e6743.
- 804 53. Xiao J, et al. (2014) Serum microRNA-499 and microRNA-208a as biomarkers of acute  
805 myocardial infarction. *Int J Clin Exp Med* 7(1):136–141.
- 806 54. Callis TE, et al. (2009) MicroRNA-208a is a regulator of cardiac hypertrophy and  
807 conduction in mice. *J Clin Invest* 119(9):2772–2786.
- 808 55. French A, et al. (2015) Enabling consistency in pluripotent stem Cell-Derived products for  
809 research and development and clinical applications through material standards. *Stem Cells*  
810 *Transl Med* 4(3):217–223.
- 811 56. Ronaldson-Bouchard K, et al. (2018) Advanced maturation of human cardiac tissue grown  
812 from pluripotent stem cells. *Nature*. doi:10.1038/s41586-018-0016-3.
- 813 57. Soiné JRD, et al. (2016) Measuring cellular traction forces on non-planar substrates.  
814 *Interface Focus*. doi:10.1098/rsfs.2016.0024.
- 815 58. Kloxin AM, Tibbitt MW, Anseth KS (2010) Synthesis of photodegradable hydrogels as  
816 dynamically tunable cell culture platforms. *Nat Protoc* 5(12):1867–87.
- 817 59. Carman ML, et al. (2006) Engineered antifouling microtopographies - correlating  
818 wettability with cell attachment. *Biofouling* 22(1–2):11–21.
- 819 60. Wang H, Haeger SM, Kloxin AM, Leinwand L a., Anseth KS (2012) Redirecting Valvular  
820 Myofibroblasts into Dormant Fibroblasts through Light-mediated Reduction in Substrate  
821 Modulus. *PLoS One* 7(7):e39969.
- 822 61. Kloxin AM, Tibbitt MW, Kasko AM, Fairbairn JA, Anseth KS (2010) Tunable hydrogels  
823 for external manipulation of cellular microenvironments through controlled  
824 photodegradation. *Adv Mater*. doi:10.1002/adma.200900917.
- 825 62. Maass AH, Buvoli M (2007) Cardiomyocyte preparation, culture, and gene transfer.  
826 *Methods Mol Biol* 366:321–30.
- 827 63. Ng CP, Hinz B, Swartz MA (2005) Interstitial fluid flow induces myofibroblast  
828 differentiation and collagen alignment in vitro. *J Cell Sci* 118(20):4731.
- 829 64. Wan W, Dixon JB, Gleason RL (2012) Constitutive Modeling of Mouse Carotid Arteries  
830 Using Experimentally Measured Microstructural Parameters. *Biophys J* 102(12):2916–  
831 2925.
- 832 65. Versaevel M, Grevesse T, Gabriele S (2012) Spatial coordination between cell and nuclear  
833 shape within micropatterned endothelial cells. *Nat Commun* 3:671.
- 834 66. Zar JH (2010) *Biostatistical analysis 5th edition* (Upper Saddle River, NJ: Pearson  
835 Prentice-Hall).
- 836 67. R Core Team (2014) R: A Language and Environment for Statistical Computing.  
837  
838  
839

840 **Figure Legends:**

841  
842 **Figure 1. Fabrication and characterization of smooth or stiff photopatterned PEG hydrogel**  
843 **cell culture substrates** **A.** A monolithic gel with Young's stiffness of 35kPa was fabricated with  
844 entrapped gelatin as an adhesive ECM ligand. Microtopographies were generated by directing  
845 collimated 365nm light ( $15\text{mW}/\text{cm}^2$ ) through a photomask. Feature dimensions were  $5\mu\text{m} \times$   
846  $5\mu\text{m}$ ,  $10\mu\text{m} \times 5\mu\text{m}$ ,  $20\mu\text{m} \times 5\mu\text{m}$ , and  $40\mu\text{m} \times 5\mu\text{m}$ . Channels were  $5\mu\text{m}$  wide. All features were  
847 spaced  $5\mu\text{m}$  apart. **B.** Gels were then softened to 10kPa by irradiating with 365nm ( $10\text{mW}/\text{cm}^2$ )  
848 light to decrease crosslinking density at the gel surface. **C.** To generate soft substrates, gels with  
849 an initial stiffness of 35kPa were irradiated for 5 minutes to reach a final soft stiffness of 10kPa.  
850 **D.** After swelling in PBS for 2-3 days, NRVMs were seeded on the patterned gels at a density of  
851  $50,000\text{ cells}/\text{cm}^2$ . **E.** Time-sweep of the Young's modulus when the hydrogel was exposed to  
852 365nm ( $10\text{mW}/\text{cm}^2$ ) light.

853  
854 **Figure 2. Sarcomeres in cells cultured on hydrogels are more organized than cells cultured**  
855 **on TCPS.** Fluorescent staining of F-actin (green) in NRVMs cultured on TCPS or 10kPa gels  
856 patterned with  $5\mu\text{m}$  channels ( $\infty:1$  aspect ratio). Nuclei were stained with DAPI (blue). NRVMs  
857 were also spontaneously contracting by day 4 of culture.

858  
859 **Figure 3. Cells exhibit greater alignment to the substrate pattern as the aspect ratio of the**  
860 **pattern increases from 1:1 to  $\infty:1$ .** **A.** The angular difference between the pattern and the major  
861 axis of each cell nucleus was calculated. (not to scale) **B.** The horizontal axis represents the  
862 angular difference between the substrate major axis and the major axis of cell nuclei. **C.** The  
863 increase in nuclear alignment with the pattern can be visualized by plotting the variance of the  
864 histograms from the above panes. On 8:1 and  $\infty:1$  patterns, the circular standard deviation was  
865 significantly lower than smooth gel and TCPS conditions for both 10kPa and 35kPa gels.  $n =$   
866 200-400 cells per group. \* indicate  $p < 0.05$  vs. smooth group based on the equal kappa test.

867  
868 **Figure 4. Topographical cues direct NRVM morphology and F-actin alignment.** **A.**  
869 Fluorescent and brightfield images show greater F-actin alignment within cells for NRVMs  
870 cultured on substrates with increasing pattern aspect ratio. A relatively cell-free area neighboring  
871 the region chosen for the F-actin/DAPI panel in the same field of view was selected to reveal the  
872 gel pattern. **B.** Cell aspect ratios increase with increasing pattern aspect ratio. **C.** F-actin  
873 alignment increases with increasing pattern aspect ratio and is greater in 35kPa gels than in  
874 10kPa gels for 1:1 aspect ratio gels. \* next to legend indicates  $p < 0.05$  for regression slope  
875 \* =  $p < 0.05$  for 10kPa vs. 35kPa,  $t = p < 0.05$  vs. TCPS

876  
877 **Figure 5. Fractional shortening increases with aspect ratio in softer gels but decreases at**  
878 **highest aspect ratio in stiff gels.** Aspect ratios of 2:1 or greater increase fractional shortening  
879 relative to TCPS in soft gels. The stiff, channeled pattern significantly reduces fractional  
880 shortening relative to soft channels. \* next to legend indicates  $p < 0.05$  for regression slope  
881 \* =  $p < 0.05$  for 10kPa vs. 35kPa,  $t = p < 0.05$  vs. TCPS

882  
883 **Figure 6. Several pathological fetal genes are downregulated on gels, while pattern aspect**  
884 **ratio significantly affects expression of fetal genes.** **A.** Fetal gene expression. *Anf* (*Nppa*)  
885 expression significantly increases with pattern aspect ratio as well as a trend for increasing *Anf*

886 expression on stiff, 35kPa gels, vs 10kPa gels. Alpha-skeletal actin (*Acta1*) expression was  
887 significantly greater on stiff gels vs soft at aspect ratios greater than 1:1 and increases with  
888 increasing pattern aspect ratio. **B.** Alpha-myosin heavy chain (*Myh6*) expression decreases while  
889 beta-myosin heavy chain increases on stiff vs soft gels and with increasing aspect ratio. **C.** miR-  
890 208a expression decreases on patterned 10kPa hydrogels. miR-208a expression also increases  
891 with increasing pattern aspect ratio on 10kPa gels. The fold change magnitude of miR-499  
892 expression on hydrogels vs. TCPS was large but statistically insignificant due to biological  
893 variability.

894 \* next to legend indicates  $p < 0.05$  for regression slope

895 \* =  $p < 0.05$  for 10kPa vs. 35kPa, t =  $p < 0.05$  vs. TCPS

896

897 **Figure 7. Substrate stiffness and topographical cues significantly affect NRVM physiology.**

898 Culturing NRVMs on 10kPa patterned hydrogels resulted in attenuated pathological gene  
899 expression as well as increased fractional shortening. Using a range of patterns and substrate  
900 stiffnesses, we were able to capture both physiological and pathological states.  
901

902 **Table 1:** Significance levels (p-values) of regression slopes

| Assay result              | Regression coefficient |       |
|---------------------------|------------------------|-------|
|                           | 10kPa                  | 35kPa |
| Cell aspect ratio         | ***                    | ***   |
| F-actin alignment index   | ***                    | ***   |
| Fractional shortening     | ***                    | NS    |
| <i>Anf</i>                | ***                    | *     |
| $\alpha$ MHC              | NS                     | **    |
| $\beta$ MHC               | **                     | NS    |
| $\alpha$ MHC/ $\beta$ MHC | NS                     | **    |
| <i>Acta1</i>              | ***                    | **    |
| <i>Ctgf</i>               | ***                    | ***   |
| <i>Mmp2</i>               | NS                     | NS    |
| <i>Colla1</i>             | ***                    | NS    |
| <i>Cav1.2</i>             | NS                     | NS    |
| <i>Serca2a</i>            | NS                     | NS    |
| miR-208a                  | *                      | NS    |
| miR-499                   | NS                     | NS    |

903 \*\*\* =  $p < 0.001$ ; \*\* =  $p < 0.01$ ; \* =  $p < 0.05$ ; NS = not significant

904

905

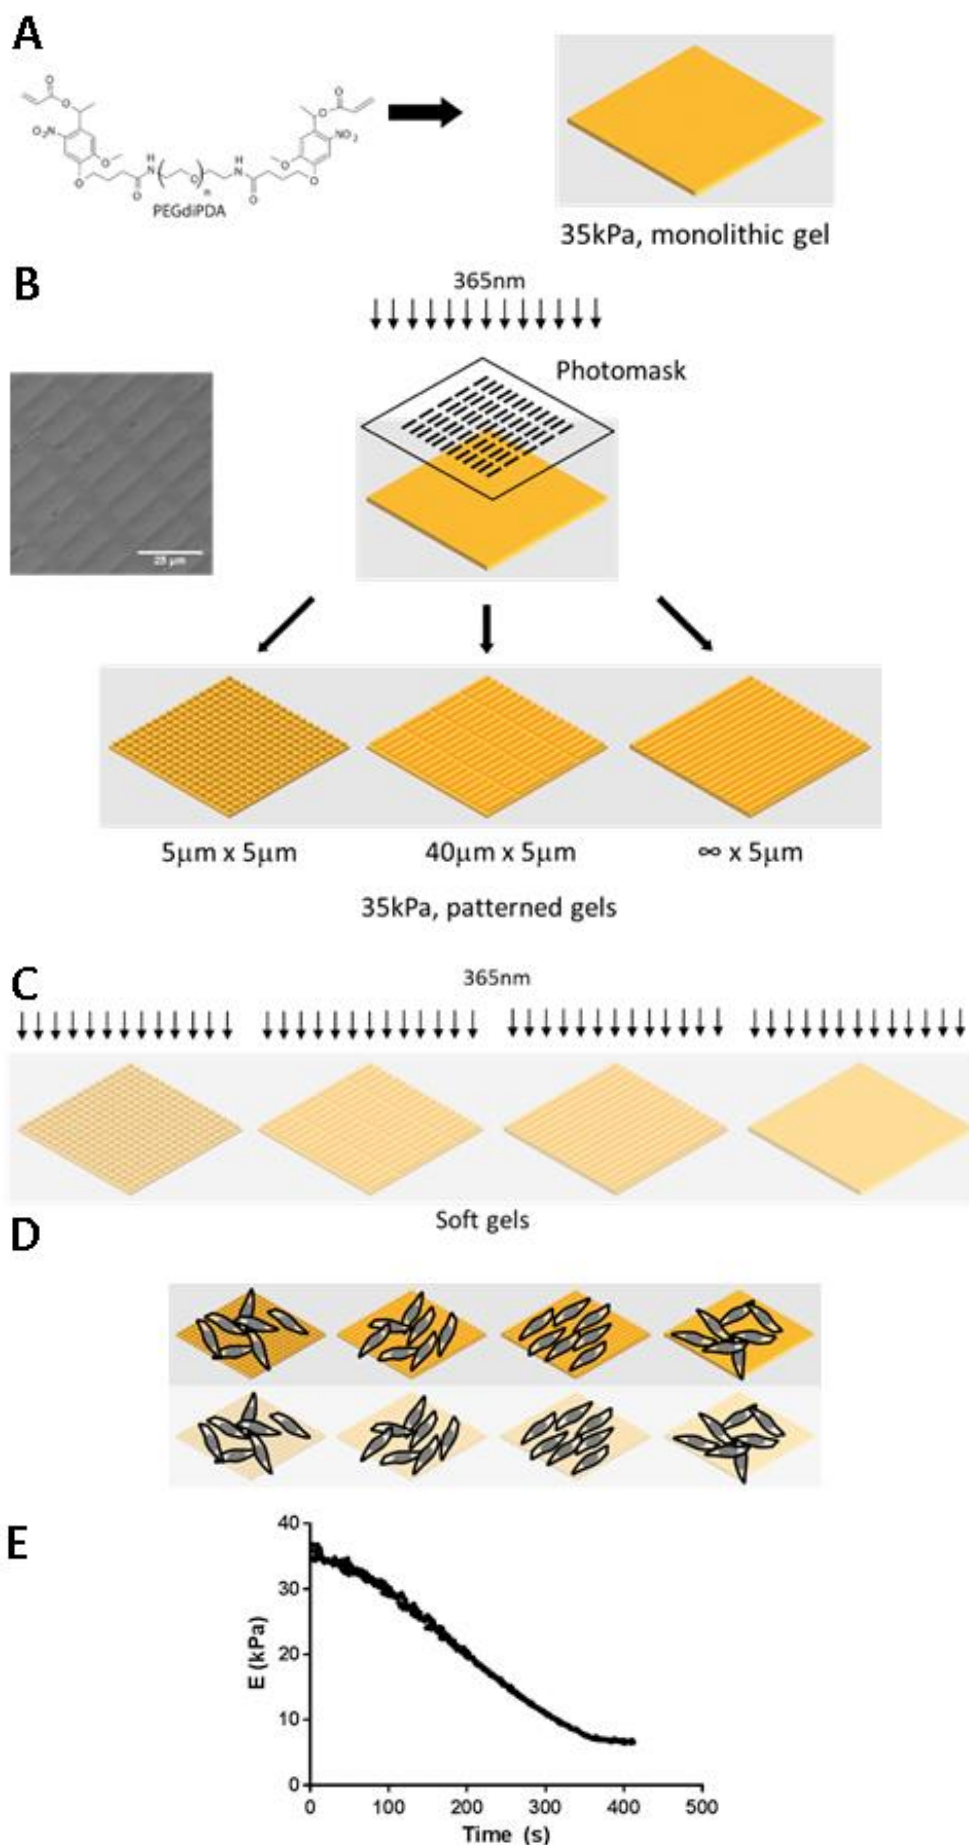

Figure 1



TCPS

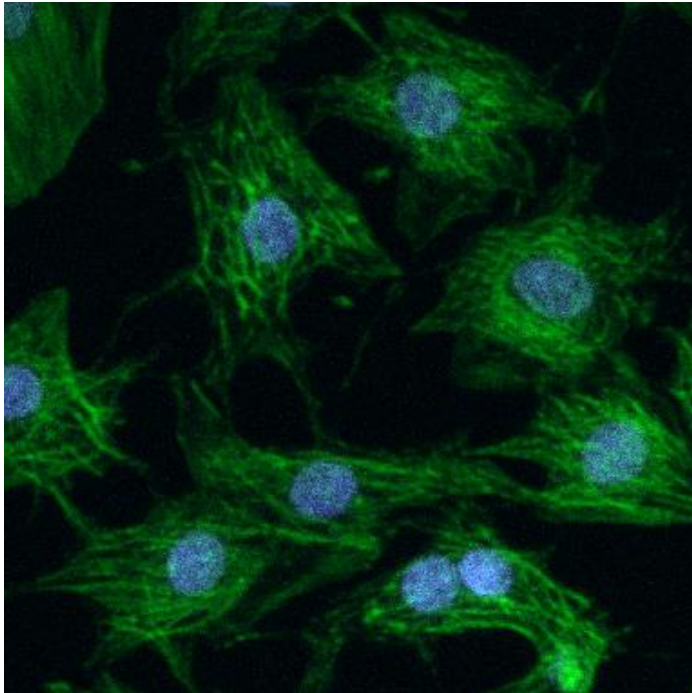

10 kPa,  $\infty$ :1 gel

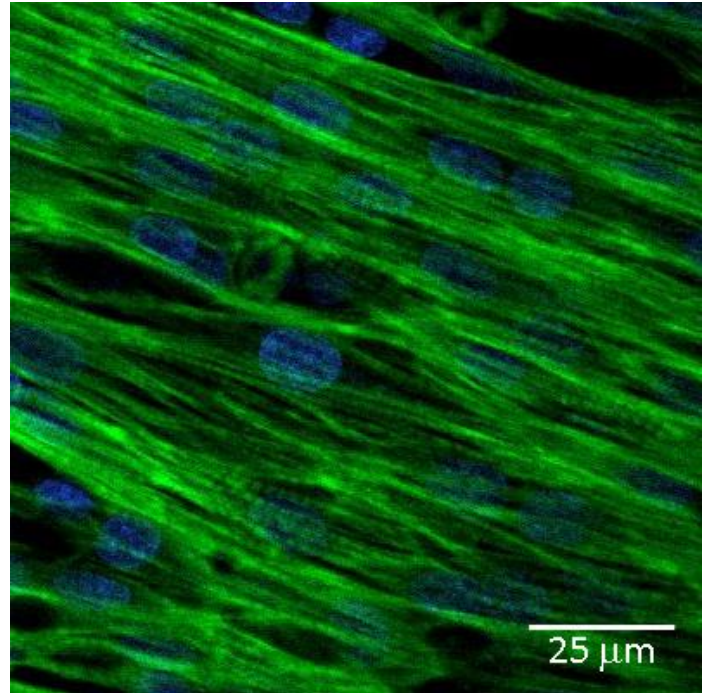

25  $\mu$ m

Figure 2

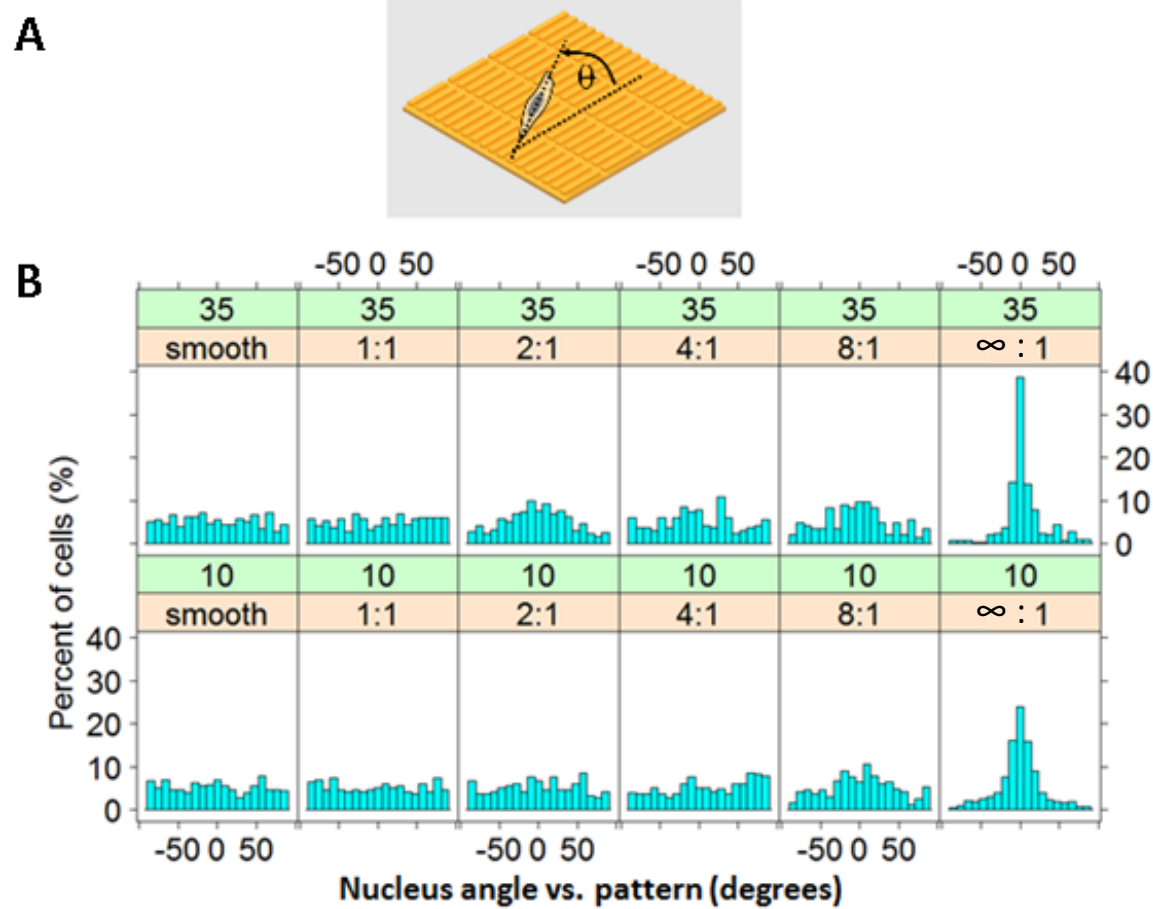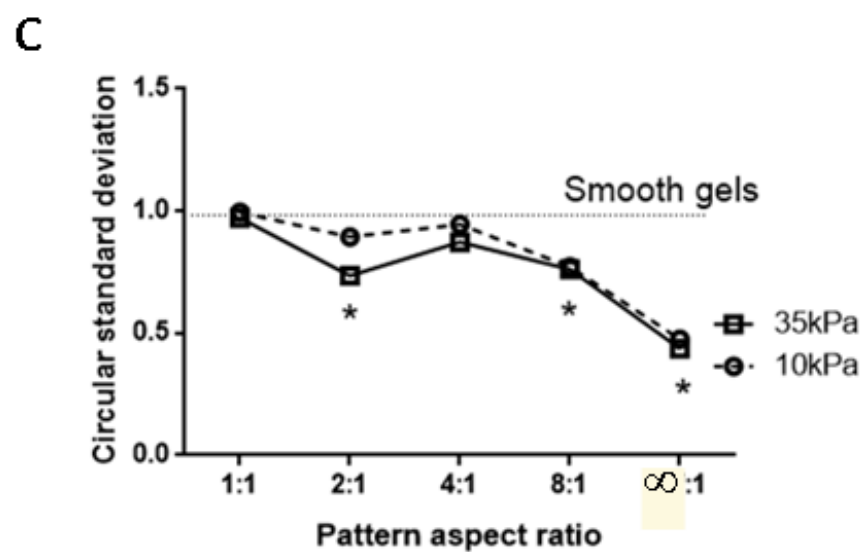

Figure 3

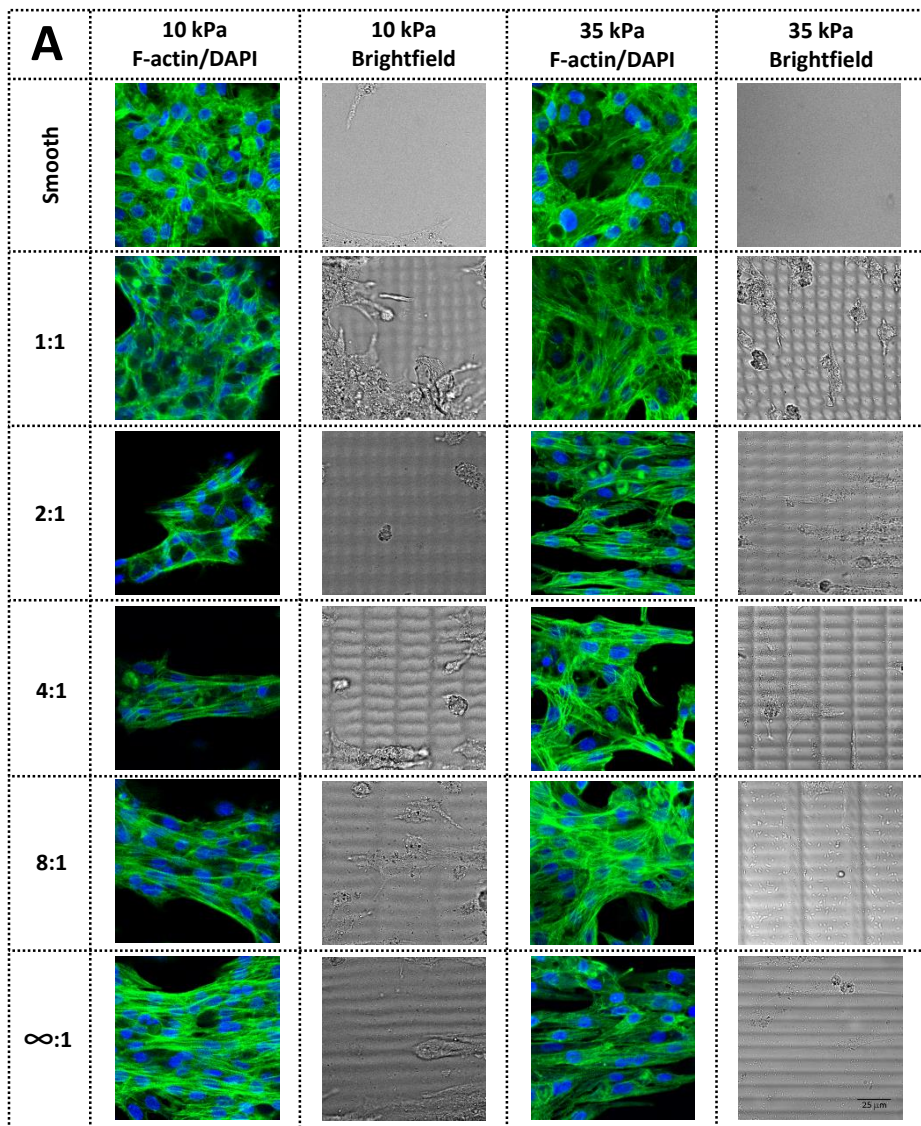

**B**

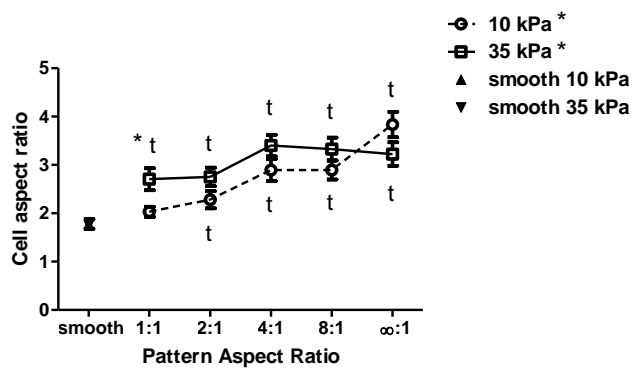

**C**

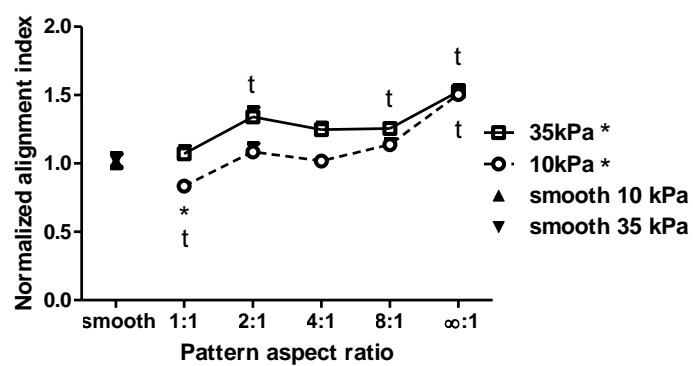

**Figure 4**

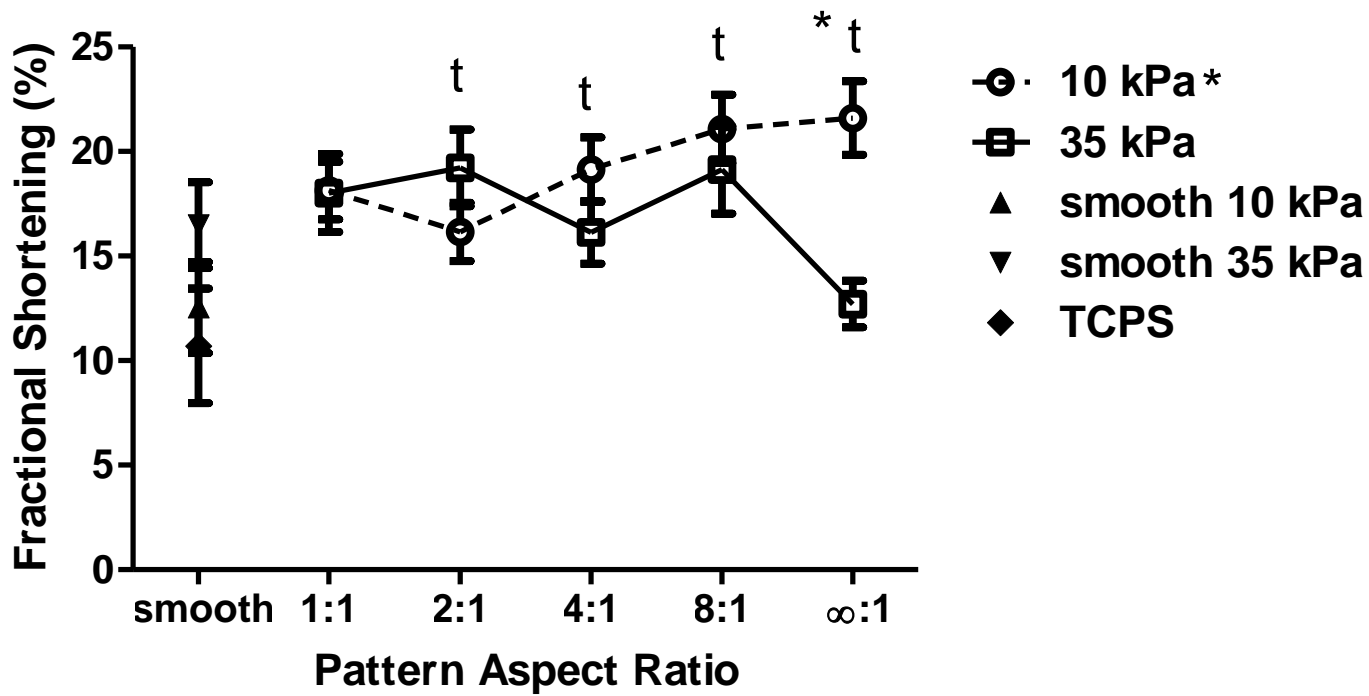

Figure 5

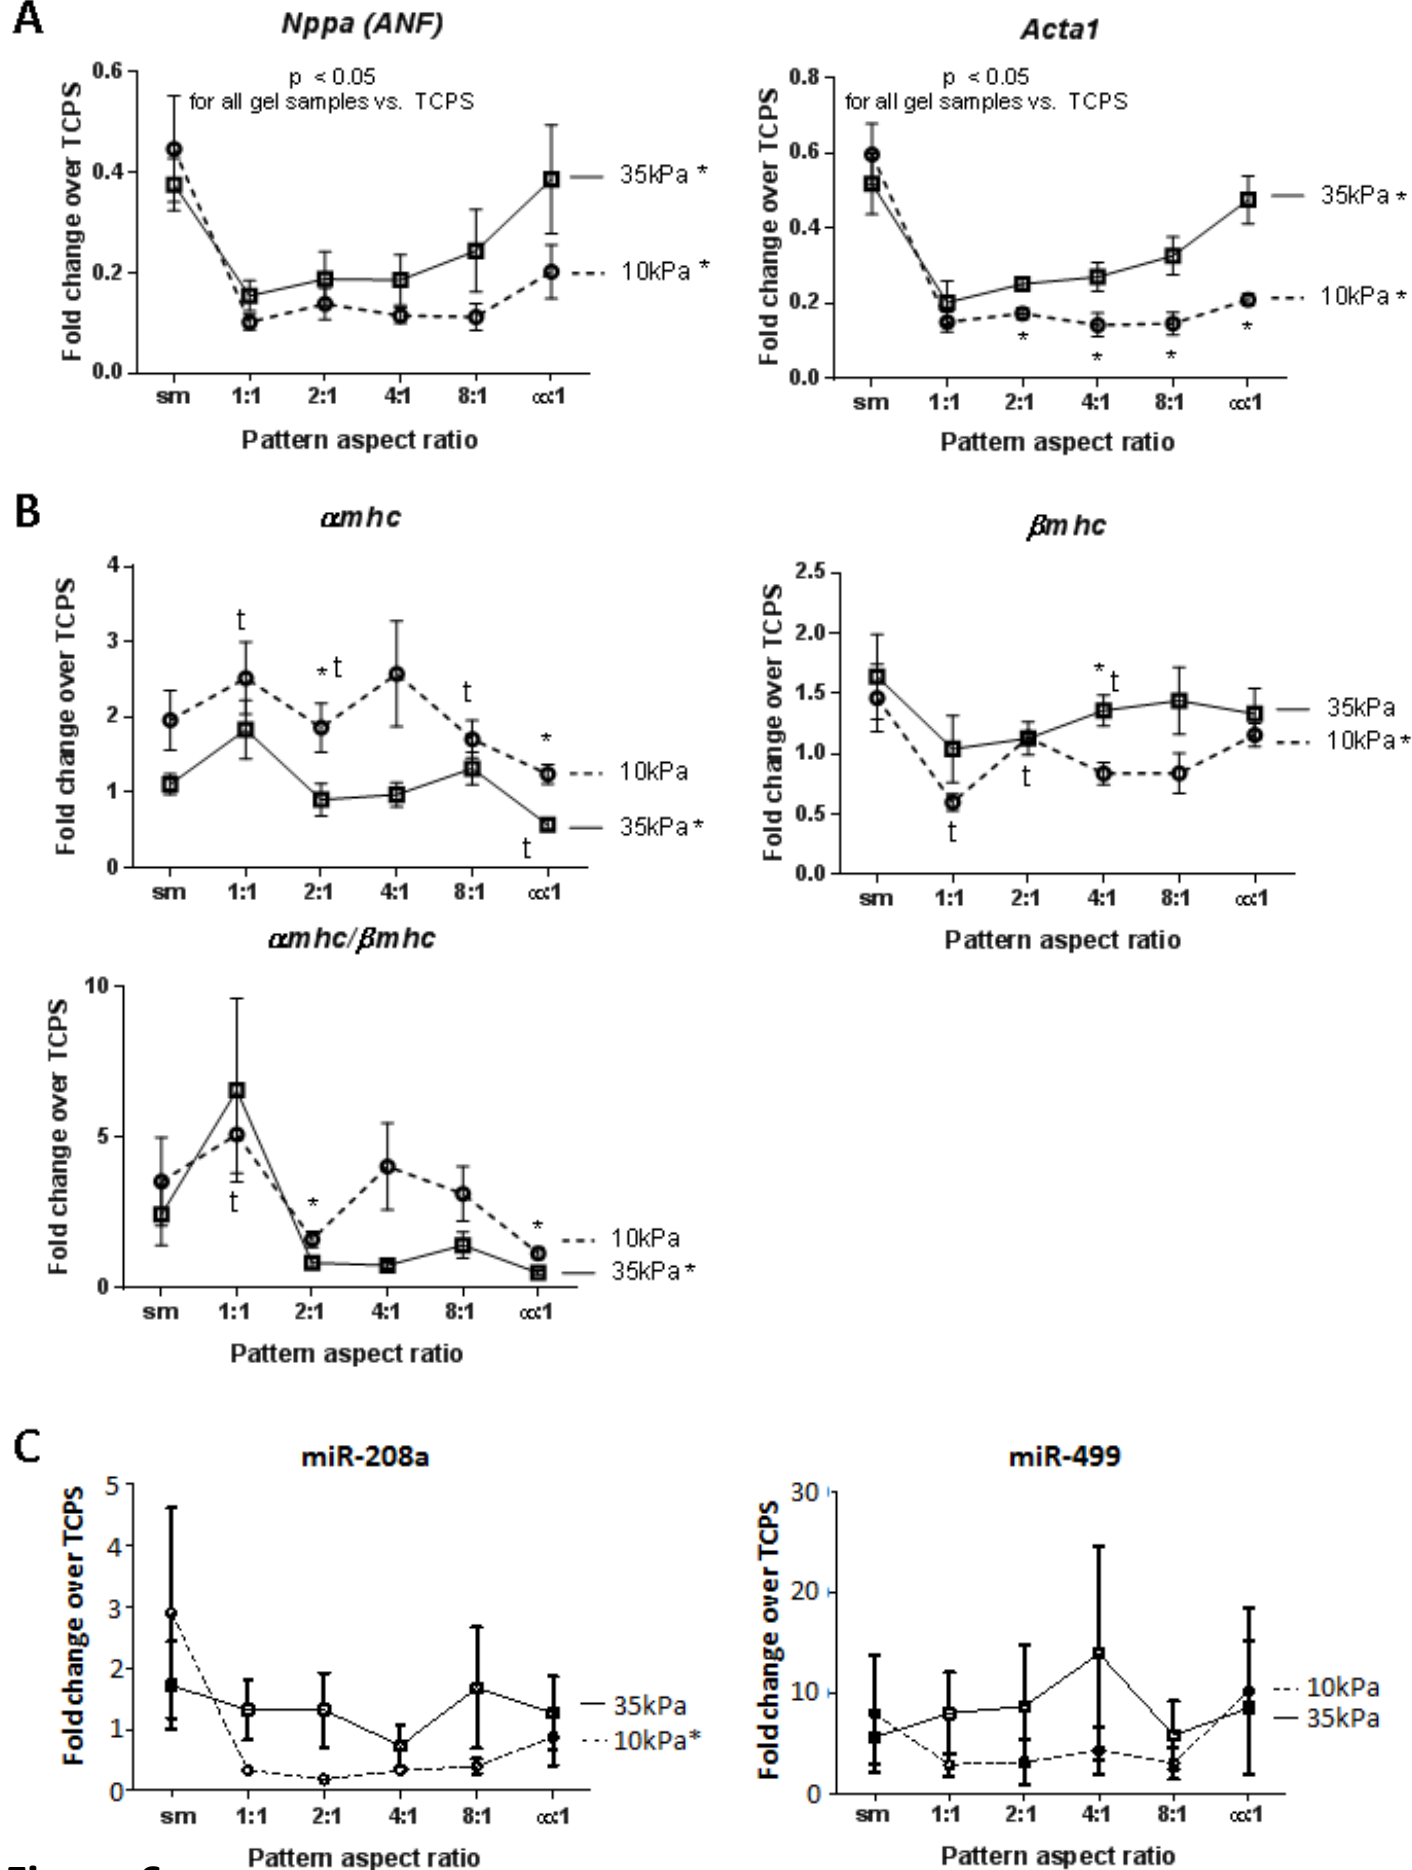

**Figure 6**



Traditional tissue culture on glass or plastic surfaces

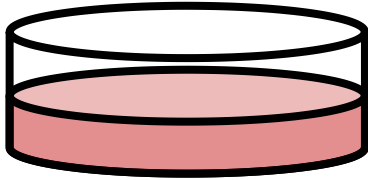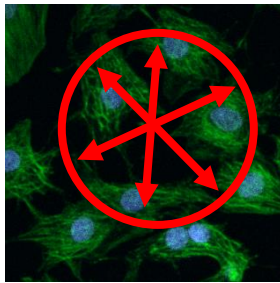

Non-physiological substrate stiffness  
↑ Myocyte disarray  
↓ Fractional shortening (10%)  
↑ Fetal gene expression  
↑ ECM remodeling

Tissue culture on patterned, soft hydrogel substrates

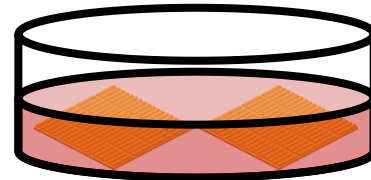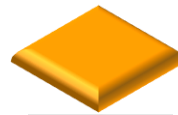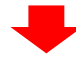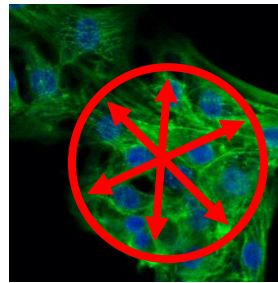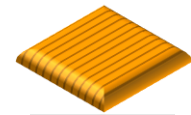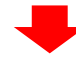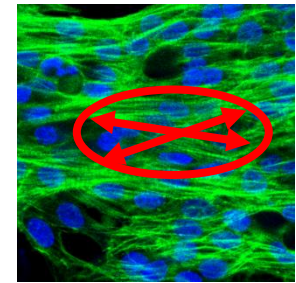

Physiological substrate stiffness +  
patterning  
↓ Myocyte disarray  
↑ Fractional shortening (20%)  
↓ Fetal gene expression  
↓ ECM remodeling

Figure 7
